# Supplementary material for: Unusual luminescent octanuclear stellate platinacycle self-assembled by Pt–Ag bonds
Source: Royal Society of Chemistry journal article supplement (doi:10.1039/b706439j), 2007-01-01
Supplement: b706439j.pdf [file b706439j.pdf]

## Unusual luminescent octanuclear stellate platinacycle self-assembled by Pt-Ag bonds

Larry R. Falvello\*,<sup>a</sup> Juan Forniés,<sup>\*a</sup> Elena Lalinde,<sup>\*b</sup> Babil Menjón,<sup>a</sup> M. Angeles García-Monforte,<sup>a</sup> M. Teresa Moreno<sup>b</sup> and Milagros Tomás<sup>a</sup>

<sup>a</sup> Departamento de Química Inorgánica, Instituto de Ciencia de Materiales de Aragón, Universidad de Zaragoza-Consejo Superior de Investigaciones Científicas, 50009 Zaragoza, Spain.

<sup>b</sup> Departamento de Química-Grupo de Síntesis Química de La Rioja, UA-CSIC, Universidad de La Rioja, 26006, Logroño, Spain.

### Experimental

**General Procedures and Materials.** The starting materials (NBu<sub>4</sub>)[{Pt(C<sub>6</sub>Cl<sub>5</sub>)<sub>2</sub>}<sub>2</sub>(μ-OH)<sub>2</sub>] (**1**)<sup>§1</sup> and AgClO<sub>4</sub><sup>§2</sup> were prepared as described elsewhere. Elemental analyses were carried out with a Perkin-Elmer 2400-Series II microanalyser. IR spectra of KBr discs were recorded on a Spectrum One Perkin-Elmer spectrophotometer (4000–350 cm<sup>-1</sup>). Conductivities were measured in acetone solution (*ca.* 5 × 10<sup>-4</sup> molL<sup>-1</sup>) using a Jenway 4510 conductimeter. UV-visible spectra in solution were obtained on a Hewlett Packard 8453 spectrometer. Diffuse reflectance UV-vis (DRUV) spectra of pressed powder were recorded on a Unicam UV-4 spectrophotometer with an integrating sphere accessory type Spectralon RSA-UC-40 Labsphere. Emission, excitation spectra and lifetimes were obtained on a Perkin-Elmer Luminescence Spectrometer LS 50B and on a Jobin-Yvon Horiba Fluorolog 3-11 Tau-3 spectrofluorimeter. Quantum yield in solid state was measured upon excitation at 390 nm using a F-3018 Integrating Sphere mounted into a Fluorolog 3-11 Tau-3 spectrofluorimeter. Data were fitted using the Jobin-Yvon software package.

**Caution:** Perchlorate salts are potentially explosive. Only small amounts of material should be prepared, and these should be handled with great caution.

**Preparation of crystals of  $(\text{NBu}_4)_2[\{\text{Pt}(\text{C}_6\text{Cl}_5)_2\}_2(\mu\text{-OH})_2]$ <sup>§1</sup> (**1**).** Crystals suitable for X-ray diffraction analysis were obtained by slow diffusion of a layer of *n*-hexane into a solution of **1** in  $\text{CH}_2\text{Cl}_2$  at 5 °C.

**Synthesis of *cyclo*- $[\{\text{Pt}(\text{C}_6\text{Cl}_5)_2(\mu\text{-OH})(\mu\text{-Ag})\}_4]\cdot\text{C}_6\text{H}_6$  (*Pt-Ag*) (**2**).** $\text{C}_6\text{H}_6$ . To a solution of  $(\text{NBu}_4)_2[\{\text{Pt}(\text{C}_6\text{Cl}_5)_2\}_2(\mu\text{-OH})_2]$  (**1**) (0.10 g, 0.05 mmol) in  $\text{CH}_2\text{Cl}_2$  (20 cm<sup>3</sup>) was added  $\text{AgClO}_4$  (0.02 g, 0.10 mmol) and the amount of  $\text{C}_6\text{H}_6$  required to dissolve it (*ca.* 5 cm<sup>3</sup>). Almost immediately a bright yellow solid formed and after 30 min of stirring under exclusion of day-light, it was filtered, washed with *n*-hexane and vacuum dried (**2**: 0.05 g, 0.01 mmol, 40% yield). Anal. Found: C, 19.7; H, 0.4.  $\text{C}_{54}\text{H}_{10}\text{Ag}_4\text{Cl}_{40}\text{O}_4\text{Pt}_4$  requires: C, 23.9; H, 0.9%. IR (Nujol, cm<sup>-1</sup>):  $\nu_{\text{max}}$  3565 (m), 3264 (m), 1492 (w), 1333 (vs), 1312 (s), 1299 (s), 1287 (vs), 1210 (m), 1030 (w), 1108 (w), 950 (w), 845 (w;  $\text{C}_6\text{Cl}_5$ : X-sensitive vibr.),<sup>§3</sup> 739 (w), 703 (w), 670 (s), 628 (s; Pt–C),<sup>§4</sup> 530 (sh), 516 (w) and 360 (w).  $\Lambda_{\text{M}}$  (acetone): 135  $\Omega^{-1}\cdot\text{cm}^2\cdot\text{mol}^{-1}$ .

Crystals of **2** suitable for X-ray diffraction analysis were obtained by room temperature slow diffusion of a three-layer system: i) a  $\text{C}_6\text{H}_6$  solution of  $\text{AgClO}_4$  overlaid on ii) a thin layer of pure  $\text{CH}_2\text{ClCH}_2\text{Cl}$  overlaid on iii) a  $\text{CH}_2\text{Cl}_2$  solution of **1**. The  $\text{CH}_2\text{ClCH}_2\text{Cl}$  interlayer was introduced to avoid immediate reaction between the upper and lower solutions.

## References

- §1 G. López, J. Ruiz, G. García, C. Vicente, J. M. Martí, J. A. Hermoso, A. Vegas and M. Martínez-Ripoll, *J. Chem. Soc., Dalton Trans.*, 1992, 53.
- §2  $\text{AgClO}_4$  was obtained by the action of  $\text{HClO}_4$  on freshly prepared  $\text{Ag}_2\text{CO}_3$ : N. R. Thompson, in *Comprehensive Inorganic Chemistry, Vol. 3* (Ed.: J. C. Bailar, H. J. Emeléus, R. Nyholm, A. F. Trotman-Dickenson), Pergamon Press, Oxford, UK, 1973, p 109. The procedure was similar to that described

for the synthesis of  $\text{AgClO}_4$  by the action of  $\text{HClO}_4$  on freshly prepared  $\text{Ag}_2\text{O}$ :  
A. E. Hill, *J. Am. Chem. Soc.* 1921, **43**, 254.

§3 R. Usón and J. Forniés, *Adv. Organomet. Chem.* 1988, **28**, 219–297; E.,  
Maslowsky, Jr., *Vibrational Spectra of Organometallic Compounds*, John  
Wiley & Sons, New York, 1977, pp 437–442.

§4 J. Casabó, J. M. Coronas and J. Sales, *Inorg. Chim. Acta* 1974, **11**, 5.

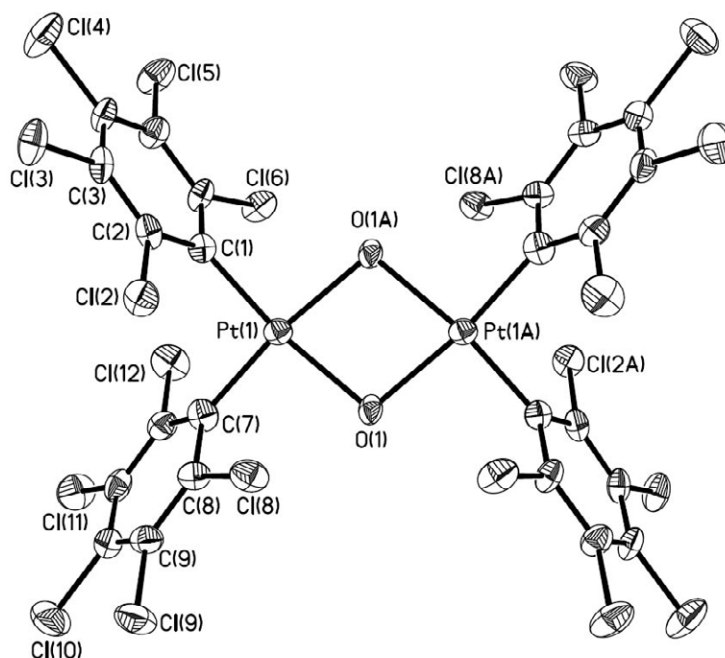

**Fig. S1** Molecular structure of the anion  $[\{\text{Pt}(\text{C}_6\text{Cl}_5)_2\}_2(\mu\text{-OH})_2]^{2-}$  in **1**. Only one of the two independent anions is shown. The additional "A" letter in the atom labels indicates atoms at equivalent position  $(-x, 1-y, 1-z)$ . Ellipsoids are drawn at the 50% probability level. Selected bond lengths (Å) and angles (°): Pt(1)-C(1) 1.985(6), Pt(1)-C(7) 1.985(6), Pt(1)-O(1) 2.122(4), Pt(1)-O(1A) 2.123(4), Pt(1)-Pt(1A) 3.2201(14); C(1)-Pt(1)-C(7) 96.9(2); C(7)-Pt(1)-O(1) 90.9(2); C(1)-Pt(1)-O(1A) 90.83(19); O(1)-Pt(1)-O(1A) 81.33(16); Pt(1)-O(1)-Pt(1A) 98.67(16).

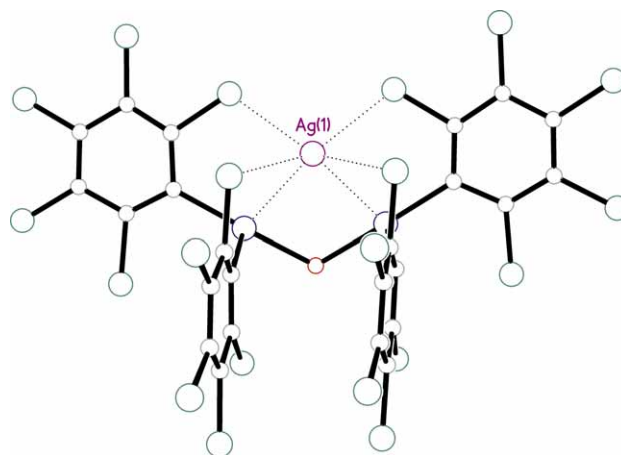

**Fig. S2** Prismatic trigonal environment for Ag atoms in complex **2** showing the Ag $\cdots$ Cl interactions.

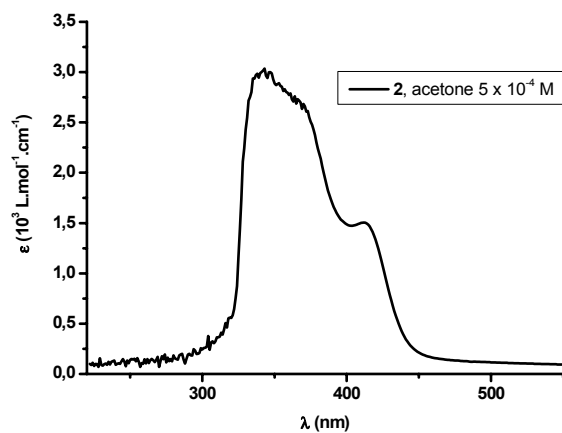

(a)

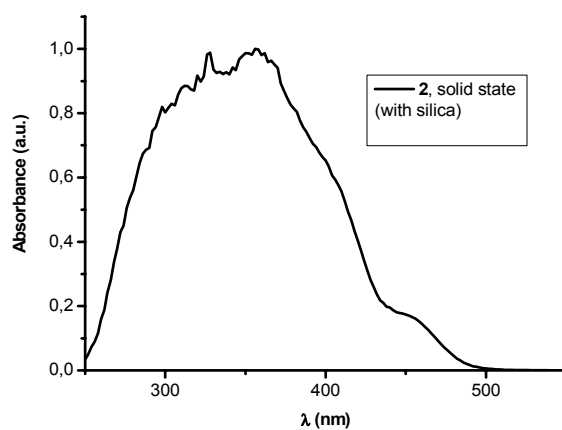

(b)

**Fig. S3** (a) Absorption spectrum of **2** in acetone solution  $5 \times 10^{-4}$  M; (b) Diffuse Reflectance UV-vis (DRUV) spectrum of **2** in the solid state (with silica).
